Pornnoppadol *et al.*

1 A hybridoma-derived monoclonal antibody with high homology to the aberrant myeloma  
2 light chain

3 **Ghasidit Pornnoppadol<sup>1,8</sup>, Boya Zhang<sup>2,8</sup>, Alec A. Desai<sup>3,8</sup>, Anthony Berardi<sup>4,8</sup>,**  
4 **Henriette A. Remmer<sup>5</sup>, Peter M. Tessier<sup>1,3,6,8</sup>, Colin F. Greineder<sup>2,7,8</sup>**

5 <sup>1</sup>Departments of Pharmaceutical Sciences, <sup>2</sup>Pharmacology, <sup>3</sup>Chemical Engineering,  
6 <sup>4</sup>Macromolecular Science & Engineering, <sup>5</sup>Proteomics & Peptide Synthesis Core, <sup>6</sup>Biomedical  
7 Engineering, <sup>7</sup>Emergency Medicine, and the <sup>8</sup>BioInterfaces Institute, University of Michigan, Ann  
8 Arbor, Michigan 48109

9  
10 \*Corresponding Author: Colin F. Greineder, BioInterfaces Institute, NCRC 10-154A, 2800  
11 Plymouth Rd. Ann Arbor, MI 48109

12 E-mail: [coling@med.umich.edu](mailto:coling@med.umich.edu)

13  
14

15 **Short Title:** Frameshift corrected version of Sp2/0 myeloma light chain

16 **iii. Key Words** ( 5-10 key words )

17 monoclonal antibody, variable regions, PCR cloning, myeloma light chain

|                               |       |
|-------------------------------|-------|
| 18 <u>Abstract Word Count</u> | 174   |
| 19 <u>Text Word Count</u>     | 3,030 |
| 20 <u>Figure Count</u>        | 4     |
| 21 <u>Reference Count</u>     | 32    |

22

23 **Abstract**

24 The identification of antibody variable regions in the heavy ( $V_H$ ) and light ( $V_L$ ) chains from  
25 hybridomas is necessary for the production of recombinant, sequence-defined  
26 monoclonal antibodies (mAbs) and antibody derivatives. This process has received  
27 renewed attention in light of recent reports of hybridomas having unintended specificities  
28 due to the production of non-antigen specific heavy and/or light chains for the intended  
29 antigen. Here we report a surprising finding and potential pitfall in variable domain  
30 sequencing of an anti-human CD63 hybridoma. We amplified multiple  $V_L$  genes from the  
31 hybridoma cDNA, including the well-known aberrant Sp2/0 myeloma  $V_K$  and a unique,  
32 full-length  $V_L$ . After finding that the unique  $V_L$  failed to yield a functional antibody, we  
33 discovered an additional full-length sequence with surprising similarity (~95% sequence  
34 identity) to the non-translated myeloma kappa chain but with a correction of its key  
35 frameshift mutation. Expression of the recombinant mAb confirmed that this highly  
36 homologous sequence is the antigen-specific light chain. Our results highlight the  
37 complexity of PCR-based cloning of antibody genes and strategies useful for identification  
38 of correct sequences.

39

40

41

42

Pornnoppadol *et al.*

## 44 **Introduction**

45 Monoclonal antibodies (mAbs) are arguably the most important and widely used reagents  
46 in contemporary biomedical research and laboratory medicine(1, 2). They form not only  
47 the basis of numerous clinical tests, from lab based ELISAs to bedside lateral flow assays,  
48 but also commonly performed research techniques, including immunohistochemistry,  
49 western blotting, and flow cytometry. Unlike clinical antibodies, which are almost always  
50 produced as recombinant proteins in mammalian expression systems, biomedical  
51 research mAbs are typically prepared from culture of the original hybridoma cell lines(3).  
52 Since purification is typically accomplished via Fc-dependent affinity chromatography (i.e.,  
53 Protein A or G) rather than methods which require affinity for the intended antigen,  
54 hybridoma-derived mAbs may be contaminated by other immunoglobulins secreted by  
55 these cell lines(4-6). The expression of heavy and light chains by myeloma fusion  
56 partners was a major concern for early hybridomas, which inevitably secreted antibodies  
57 with multiple paratopes and off-target specificities(7). The problem was mitigated by the  
58 creation and widespread adoption of Sp2/0, an immunoglobulin non-producing cell line(8),  
59 and related myelomas (e.g. NS-1, NS0, P3/X63Ag8.653, etc.), but hybridomas created  
60 using these fusion partners continue to express high levels of unproductive myeloma light  
61 chain mRNA(9, 10). In fact, multiple reports indicate the existence of additional heavy  
62 and/or light chain transcripts in many cell lines, some of which are capable of translation  
63 and production of full-length protein(11, 12). Prolonged culture, repeated passaging, and  
64 transfer between labs are likely to contribute to this problem, fueling speculation of  
65 widespread genetic and secretory variability in different preparations of supposedly  
66 “monoclonal” hybridomas(13, 14).

67  
68 These suspicions have been confirmed using next generation sequencing (NGS),  
69 revealing a diversity of heavy and light chain transcripts in many hybridomas(14). While  
70 some investigators have called for NGS of all commercially available hybridomas and  
71 replacement with validated and standardized recombinant antibodies(15), the technology  
72 remains expensive enough to prohibit its widespread application. Instead, PCR-based  
73 cloning, in which degenerate primers are used to amplify heavy and light chain variable  
74 regions from hybridoma cDNA, remains the primary means of antibody gene sequencing  
75 for most laboratories(11, 16).

76  
77 In our previous work, we reported a novel set of primers for PCR-based cloning (“SP  
78 primers”), which anneal to sequence encoding the signal peptide, just upstream of V<sub>H</sub> and  
79 V<sub>L</sub> coding regions(17). Unlike the more commonly cited “FR1 primers”, which are  
80 homologous to the first framework region, SP primers avoid the possibility of FR1 amino  
81 acid substitutions from incorporation of primer sequence(18, 19). The SP approach has  
82 another significant advantage – namely that the Sp2/0 myeloma light chain is typically  
83 amplified by just one SP primer, leaving the remaining PCR reactions available for  
84 amplification of antigen-specific sequences(17). We have used this approach to  
85 sequence more than 15 hybridomas with relatively few complications(20-23).

86  
87 We report here an interesting case of PCR-based cloning using SP primers, in which  
88 identification of the antigen-specific light chain was complicated because it was  
89 significantly (~95%) homologous to the Sp2/0 myeloma kappa chain. The existence of

90 this sequence is important to document because of to the ease with which it (or similar  
91 sequences) may be overlooked, as it was initially here. Likewise, methods aimed at  
92 eliminating the Sp2/0 myeloma sequence would likely destroy this cDNA and others like  
93 it(24, 25). Beyond cloning difficulties, the similarity to the myeloma light chain is intriguing  
94 because of the possibility that its origin might be a mutation of the myeloma sequence,  
95 rather than a splenic B cell. Ultimately, the work illustrates the complexity of PCR-based  
96 cloning of antibody genes and highlights a series of techniques capable of identifying  
97 antigen-specific sequences, even when initial efforts are confounding.

98

## 99 **Materials & Methods**

### 100 *Cell lines*

101 The mouse anti-human CD63 hybridoma, clone H5C6, developed by J.E. Hildreth at  
102 Johns Hopkins University(26), was obtained from the Developmental Studies Hybridoma  
103 Bank, created by the NICHD of the NIH and maintained at The University of Iowa,  
104 Department of Biology, Iowa City, IA 52242. CHO-K1 cells were obtained from ATCC  
105 (Manassas, VA). Both cell types were maintained in RPMI-1640 supplemented with 10%  
106 (v/v) fetal bovine serum (FBS), and 1X antibiotic-antimycotic (Thermo Fisher Scientific,  
107 Waltham, MA). For production of antibody, the hybridoma was gradually transitioned to  
108 Protein Free Hybridoma Medium II (PFHM-II, Thermo Fisher Scientific) and cultured for  
109 several days until the medium turned acidic. Supernatant was purified using Protein G  
110 Sepharose 4 Fast flow (GE Healthcare Life Sciences, Pittsburgh, PA) as per  
111 manufacturer protocol.

### 112 *Sequencing of H5C6 V<sub>H</sub> and V<sub>L</sub> cDNAs*

113 Total cellular RNA was isolated from hybridoma cells using RNeasy kit (Qiagen, Valencia,  
114 CA). Reverse transcription was performed using High-Capacity cDNA Reverse  
115 Transcription Kits (Applied Biosystems, Foster City, CA).  $V_H$  and  $V_L$  cDNAs were  
116 amplified using the ProFlex PCR system (Thermo Fisher Scientific and a previously  
117 reported set of degenerate signal peptide (SP) region primers(17).

#### 118 *N-terminal protein (Edman) sequencing*

119 Purified antibody from H5C6 hybridoma supernatant (3 ug) was reduced in beta-  
120 mercaptoethanol containing sample buffer and run on SDS-PAGE. The gel was  
121 transferred to a PVDF membrane and stained in 0.1% Coomassie R-250 in 40% methanol  
122 and the band corresponding to the light chain was excised. N-terminal amino acid  
123 sequencing was performed using the Procise 494HT Edman sequencer (Applied  
124 Biosystems, Foster City, CA) with 610A data analysis module. Each amino acid was  
125 identified by comparison of its HPLC trace to a standard set.

#### 126 *Assembly, production, purification, and characterization of recombinant antibodies*

127  $V_H$  and  $V_L$  cDNAs were cloned into a heavy and light chain vectors, both of which were in  
128 HEK293-6E expression vectors (pTT5, National Research Council Canada) with human  
129 IgG1 constant domains. A sortag (amino acid sequence LPETGG) was fused to the end  
130 of each heavy chain to enable site-specific modification with the sortase A enzyme(22).  
131 All recombinant antibodies were expressed via transient transfection with 7.5 $\mu$ g of each  
132 heavy and light chain plasmids (15 $\mu$ g total) in HEK293-6E suspension cells maintained  
133 with FreeStyle-17 media (supplemented with glutamine, kolliphor, and geneticin) using  
134 polyethylenimine transfection reagent. Supernatant was collected 6 days later and

135 recombinant mAb was purified using protein A agarose (Thermo Fisher Scientific)  
136 according to the manufacturer's protocol.

### 137 *Fluorescence labeling of hybridoma-derived and recombinant antibodies*

138 H5C6 hybridoma-derived antibody was modified with AlexaFluor 647-NHS ester (Thermo  
139 Fisher Scientific) at a 1:5 (antibody: NHS-ester) ratio for 1 hour at room temperature in  
140 PBS. Modified antibody was purified from the reaction mixture using a Amicon 100kDa  
141 MWCO centrifugal filter (MilliporeSigma, Burlington, MA). Recombinant antibody, in  
142 contrast, was site-specifically modified using a previously reported technique for  
143 sortagged affinity ligands(22). Briefly, each recombinant mAb was incubated overnight  
144 at room temperature with 1 $\mu$ M A5 mutant sortase A enzyme(27), 1mM CaCl<sub>2</sub>, and a 5-  
145 fold excess of an azidolysine containing -GGG peptide. Azide-modified antibody was first  
146 purified from the sortase reaction mixture using an Amicon 100kDa MWCO centrifugal  
147 filter and then reacted with a 5-fold excess of DBCO-AlexaFluor647 (Click Chemistry  
148 Tools, Scottsdale, AZ). Fluorescently labeled antibody was purified using centrifugal  
149 filtration. Degree of labeling for both hybridoma-derived and recombinant mAbs was  
150 calculated using their absorbance at 280 and 650nm.

### 151 *Human CD63-GFP expressing cells*

152 The CD63-pEGFP C2 plasmid was a gift from Paul Luzio (Addgene plasmid #62964)(28).  
153 The plasmid was transfected into CHO-K1 cells using Lipofectamine 2000 per  
154 manufacturer protocol. Cells were selected in media containing 1 $\mu$ g/mL of Geneticin  
155 (Thermo Fisher Scientific) and flow sorted on EGFP expression using a MoFlo Astrios  
156 cell sorter (Beckman Coulter, Brea, CA).

157



## 158 Cell binding and flow cytometry

159 Cho-hCD63-EGFP cells and Cho-K1 control cells were trypsinized, counted, and  
160 resuspended in 10% serum containing media at a concentration of  $10^6$  cells/mL. Cells  
161 were incubated for 1hr on ice with varying concentrations of fluorescently labeled  
162 hybridoma-derived or recombinant mAbs and then washed x3 in flow buffer (PBS + 3%  
163 fetal calf serum) prior to analysis on a ZE5 flow cytometer (BioRad, Hercules, CA).  
164 Equilibrium binding affinities were calculated via nonlinear regression (One site – total  
165 and non-specific binding) using Prism 7.0 software (GraphPad Software, San Diego, CA).

## 166 Results

### 167 Amplification of H5C6 variable region cDNAs

168 To amplify full-length  $V_H$  and  $V_L$  sequences from H5C6 hybridoma total cellular cDNA, we  
169 performed PCR with previously reported 5' "SP primers" (homologous to heavy or light  
170 chain signal peptides)(17) and appropriate constant region primers ( $C_{H1}$  or  $C_L$ ). Figure 1  
171 shows the PCR products generated using SP primers. One major band is seen for  $V_H$   
172 (primer SP4), whereas two bands are present for  $V_L$  (primers SP2 and SP7).

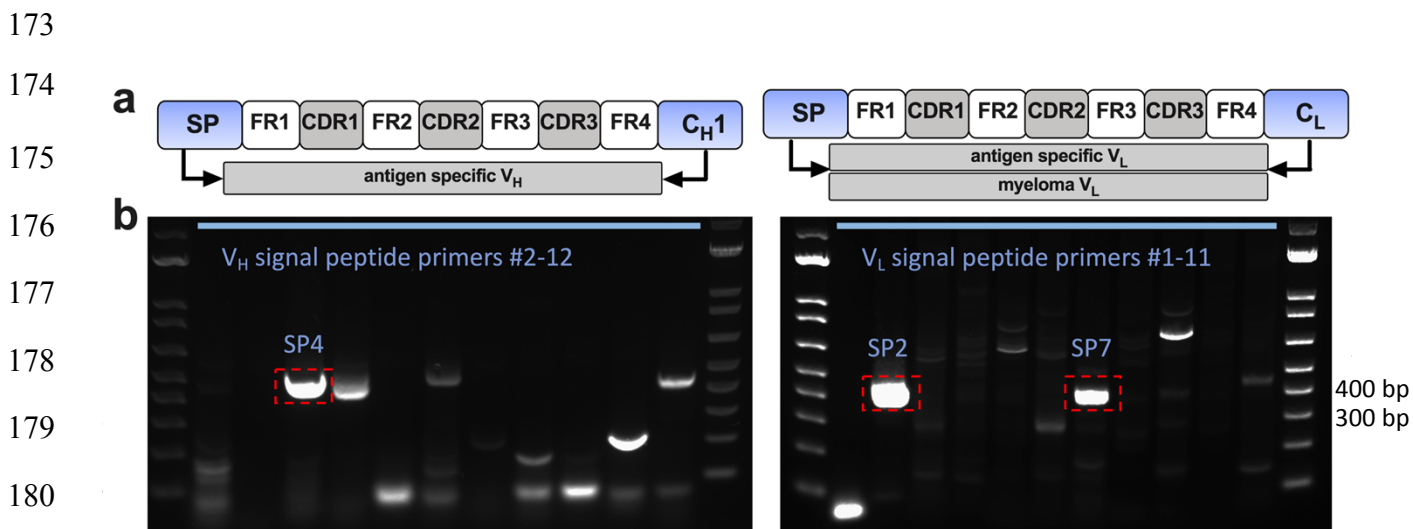

myeloma kappa chain, whereas SP7 primer amplified a full-length  $V_L$  cDNA.

182  
183 As with all prior Sp2/0-derived hybridomas investigated by our group, the SP2 primer  
184 amplified the aberrant myeloma kappa chain, a well-described sequence which does not  
185 produce secreted light chain due to the presence of a key frameshift mutation(10). While  
186 this transcript frequently complicates cloning using FR1 primers(11, 29-31), the results  
187 shown in Figure 1 are typical for SP primers, with amplification of the myeloma sequence  
188 limited to the SP2 (and, in rare cases, SP11) primer. Since other SP primers do not  
189 amplify the myeloma sequence, a properly sized amplicon in any of the other PCR  
190 reactions indicates a likely candidate sequence for the antigen-specific V<sub>L</sub>. Indeed,  
191 subcloning and sequencing of the SP4 and SP7 PCR products yielded single, full-length  
192 V<sub>H</sub> and V<sub>L</sub> cDNAs which were presumed to be hCD63-specific sequences.

193  
194 *Human CD63 expressing cells and binding of recombinant mAbs*

195 To evaluate binding to cell-surface hCD63, we generated CHO cells that stably express  
196 hCD63-EGFP fusion protein. We validated these using H5C6 hybridoma-derived mAb,  
197 purified from cell supernatant via Protein G affinity chromatography. Fluorescently  
198 modified antibody bound hCD63-expressing cells, but not wild type controls (Figure 2).

199

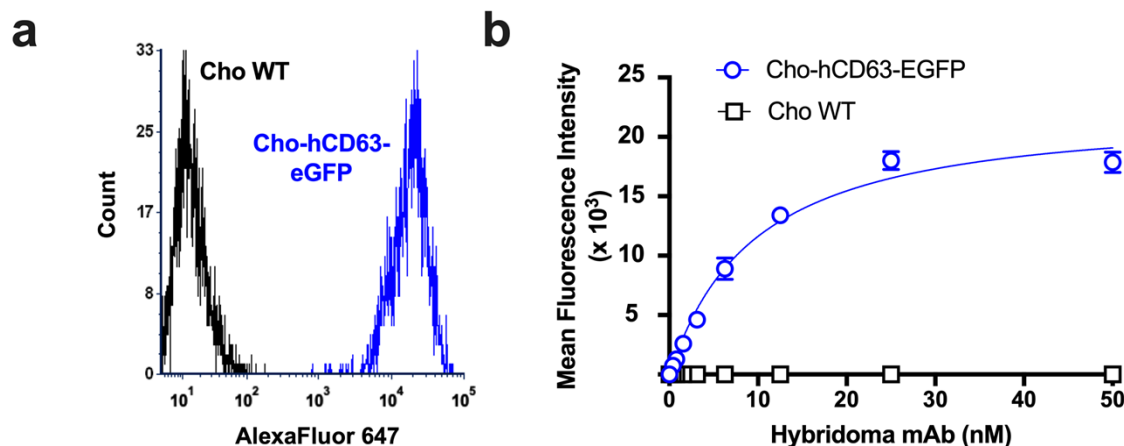

200  
201 **Figure 2.** (a) Flow cytometry histogram in far red channel showing staining of Cho-hCD63-eGFP  
202 cells, but no Cho WT cells, with 25nM AF647-modified H5C6 hybridoma-derived mAb. (b) Binding  
203 curve derived from flow cytometry data (n=3).

204  
205 We next generated recombinant mAb using the SP7 V<sub>L</sub> and SP4 V<sub>H</sub> sequences identified  
206 above (Figure 3a). SP7/SP4 mAb was purified from HEK293 cell supernatant and found  
207 to be the correct size and >95% purity on SDS-PAGE and size exclusion HPLC (Figure  
208 3b, c). Recombinant mAb was modified for flow cytometry using an amine-reactive  
209 fluorophore, but it showed no binding to hCD63-expressing cells. While this strongly  
210 suggested the incorrect specificity, we considered the unlikely possibility that fluorescent  
211 labeling might have eliminated binding affinity by modification of one or more critical lysine  
212 side chains. To exclude this, we took advantage of the C-terminal sortag incorporated  
213 into the recombinant mAb construct, and site-specifically labeled the antibody using  
214 sortase(22, 32). Once again, no specific binding was found to hCD63-positive cells, as  
215 compared to wild-type control cells (Figure 3d, e).

216

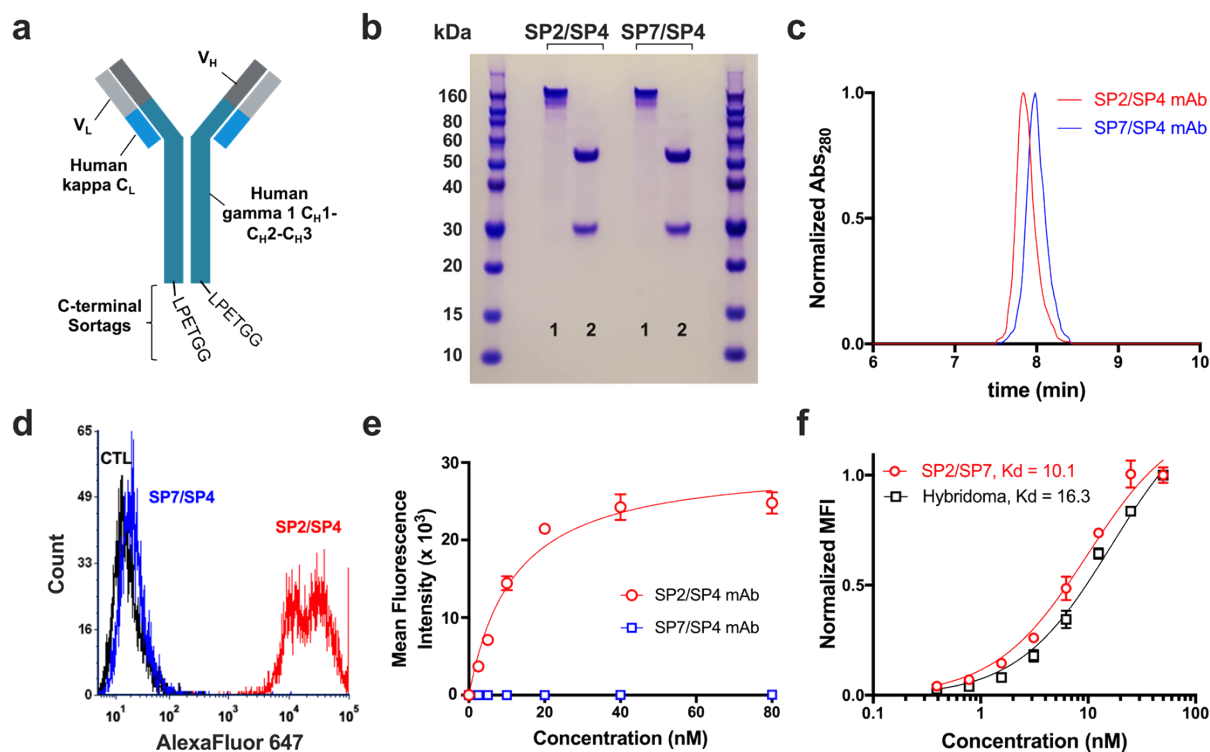

217

218 **Figure 3. Characterization of recombinant mAbs.** (a) Schematic of recombinant mAb  
 219 constructs. VL sequences were cloned in frame with human kappa CL, while VH was cloned in  
 220 frame with human CH1-CH3. The sortag sequence, LPETGG, was appended at the C-terminus,  
 221 immediately after the CH3 domain. (b) SDS-PAGE of recombinant mAbs, 1 = non-boiled, non-  
 222 reduced, 2 = boiled, reduced. (c) Size exclusion HPLC of SP2/SP4 and SP7/SP4 mAbs, showing  
 223 a single peak on the A280 detector at the expected size for immunoglobulin (7.9 min). (d) Flow  
 224 cytometry histogram showing binding of 20nM SP2/SP4 recombinant mAb, but not 20nM  
 225 SP7/SP4 mAb, to Cho-hCD63-eGFP cells. (e) Flow-based binding curve no Cho-hCD63-eGFP  
 226 cells (neither mAb showed any binding to Cho WT cells). (f) The affinity of SP2/SP4 mAb was  
 227 similar to that of H5C6 hybridoma-derived monoclonal antibody (n=3).

228

229 *N-terminal protein sequencing and identification of an additional full-length VL cDNA*

230 Based on these data, we reasoned that another full length VH and/or VL sequence must  
 231 be present in the H5C6 total cellular cDNA. To determine the N-terminal amino acid

232 sequence of each chain and enable design of specific 5' primers, we performed Edman  
 233 sequencing on the H5C6 hybridoma-derived antibody preparation. The results for the light  
 234 chain, shown in Figure 4, were unambiguous and showed that first 10 residues exactly  
 235 matched those of the myeloma light chain (Figure 4A). This suggested the existence of a  
 236

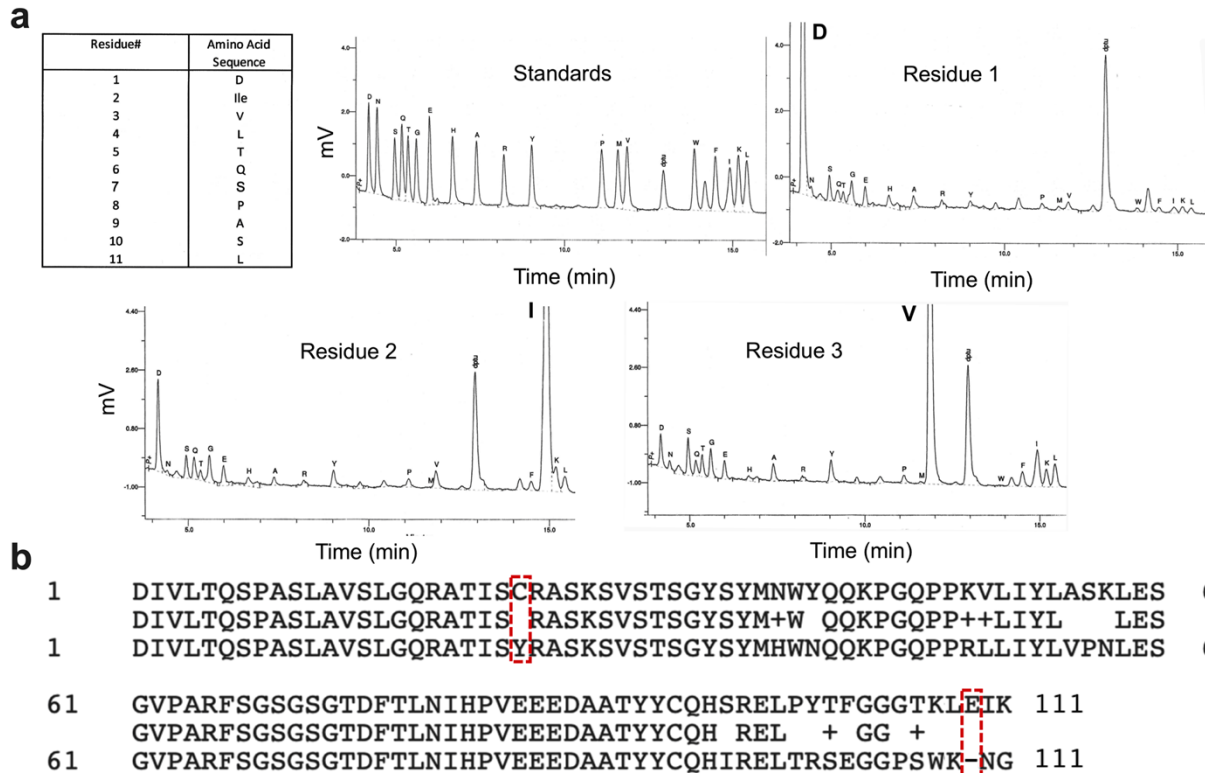

237

238 **Figure 4. Identification of frameshift-corrected analog of Sp2/0 V<sub>L</sub> cDNA** (a) Results of  
 239 Edman sequencing of H5C6 hybridoma-derived mAb – summary, standards, and first three  
 240 residues are shown. (b) Comparison of amino acid sequences of full-length SP2 V<sub>L</sub> cDNA and  
 241 aberrant Sp2/0 myeloma sequence. Both the frameshift mutation and the conserved cysteine  
 242 (C23Y) mutation are corrected in the full-length gene product.  
 243  
 244 full-length, productive V<sub>L</sub> cDNA with significant homology to the aberrant transcript, at  
 245 least over the first 30 base pairs of the coding sequence. In fact, we hypothesized that

246 the two cDNAs might have homology in the region of the signal peptide as well and that  
247 primer SP2 may have amplified them both. We subcloned the SP2 PCR product and, this  
248 time, sequenced a much larger number of clones. While many matched the Sp2/0  
249 myeloma light chain, a few contained a full-length sequence with correction of the  
250 frameshift mutation. The new cDNA had a very high level of homology to the myeloma  
251 light chain, with 94% and 82% nucleic acid and amino acid sequence identity, respectively  
252 (Figure 4B).

253

#### 254 *Synthesis of recombinant mAb and confirmation of binding to hCD63*

255 The newly identified SP2 V<sub>L</sub> cDNA was incorporated into the recombinant mAb construct  
256 with SP4 V<sub>H</sub>. After confirmation of size and purity (Figure 3B), SP4/SP2 mAb was site-  
257 specifically labeled using sortase A and evaluated by flow cytometry for binding to hCD63-  
258 expressing cells. As shown in Figure 3B, the recombinant antibody showed high-affinity,  
259 saturable binding to Cho-hCD63 cells, but not wild-type controls. The affinity was  
260 compared to that of the hybridoma-derived mAb and found to be similar but slightly higher  
261 ( $K_D = 10.1$  nM vs.  $16.3$  nM, Figure 3C).

262

#### 263 **Discussion**

264 This report represents a continuation of our ongoing efforts to sequence hybridomas with  
265 potential utility in affinity-based drug targeting and, in the process, to help refine and  
266 improve rapid, PCR-based cloning of antibody variable chain sequences(17, 21, 22).  
267 While some have advocated for next-generation sequencing (NGS) to replace traditional  
268 techniques, we believe that the substantial cost associated with this technique makes

269 PCR-based methods a more viable option for most laboratories and justifies continued  
270 focus on this approach.

271  
272 In our previous report, we detailed the use of signal peptide (“SP”) primers as a means of  
273 quickly and efficiently differentiating antigen-specific and myeloma-derived V<sub>L</sub>  
274 sequences(17). Implicit in this approach is the assumption that these sequences do not  
275 share significant homology. Our experience with the H5C6 hybridoma is an important  
276 reminder that this assumption may not always be valid. It is worth noting that this pitfall is  
277 not unique to PCR-based hybridoma sequencing, as the high level of homology observed  
278 in this case likely would have confounded any technique. Even NGS, which would have  
279 presumably identified both sequences, would be unlikely to classify the full-length SP2 V<sub>L</sub>  
280 as a candidate for antigen-binding. Rather, the sequence would likely be flagged as either  
281 a sequencing artifact or a frameshift-corrected version of the Sp2/0 sequence, perhaps  
282 resulting from prolonged hybridoma culture.

283  
284 Given the significant challenge that this pitfall posed, the current results are also a  
285 demonstration of how a careful and systematic approach can result in successful  
286 identification of variable chain sequences, even when initial results are confusing. Several  
287 key steps can be identified as being of particular importance to our end result. First, our  
288 efforts benefitted from a transient expression system capable of rapid production of  
289 candidate mAbs and appropriate reagents for testing of antigen binding. The latter  
290 included a positive and negative cell line, hybridoma-derived mAb for comparison, and a  
291 site-specific modification technique to exclude potential artifacts related to fluorescent

292 labeling(22). Together, these resources led to prompt recognition that the SP7/SP4 mAb  
293 was incorrect, while other assays – e.g., testing mAbs on tissue slices – might have  
294 delayed or obscured this conclusion. A second key feature of our approach was the use  
295 of SP primers, which typically produce a smaller number of  $V_L$  reactions with products of  
296 the correct size (presumably reflecting less overlap in the range of sequences capable of  
297 amplification by each primer). This reduces the burden of subcloning and screening  
298 multiple clones per fragment. In the case of H5C6, it pointed the finger clearly at the SP2  
299 reaction, once the SP7 sequence had been excluded. If not for our prior experience with  
300 SP2, we likely would have screened a large number of SP2 clones at this point and  
301 successfully identified the full-length  $V_L$ . Instead, it took another technique -- protein  
302 sequencing, which has been useful in working out other challenging hybridomas(20, 23).  
303 Ultimately, we believe that NGS will simplify this process considerably, but a systematic  
304 approach, high quality reagents, and an awareness of potential pitfalls will remain critical  
305 to successful identification of variable chain sequences.

306  
307 Apart from these pragmatic observations, the current work should add to the growing  
308 chorus of scientific voices advocating for replacement of hybridoma-derived preparations  
309 with sequence, defined recombinant mAbs(5, 15). As an affinity-based drug targeting  
310 laboratory, these reagents are essential to nearly every aspect of our work, and clearly,  
311 they are not the immutable cell lines some consider them to be(14). Indeed, one of the  
312 most interesting questions raised by the current results is the origin of the hCD63-specific  
313 light chain. The original report of the hybridoma describes fusion of “splenic B cells from  
314 immunized mice with the P3x653.Ag8 myeloma”(26). While this name likely refers to the



315 non-producing myeloma, P3/X63Ag8.653, it is also possible that Hildreth and colleagues  
316 inadvertently used P3/X63.Ag8, the fusion partner from Kohler and Milstein's original  
317 publication, which secretes a fully functional kappa light chain(1). Still, this would not  
318 explain the presence of the non-translated Sp2/0 transcript in the H5C6 clone, which  
319 instead suggests a subsequent recombination or mutation that corrected the aberrant  
320 light chain. Moreover, none of this clarifies what may have happened with the light chain  
321 from the original splenic B cell. These considerations do underscore, however, the  
322 complexity and inherent instability of these tetraploid cells and the importance of their  
323 gradual replacement with sequence-validated, recombinant cell lines.

324

## 325 **Acknowledgements**

326 This work was supported by the National Institute of Health grants K08 HL130430 (CFG),  
327 RF1AG059723 (PMT) and R35GM136300 (PMT), and the Albert M. Mattocks Chair  
328 (PMT).

329

## 330 **Authorship**

331 G.P. and C.F.G. conceived the study. G.P. and A.D. designed and synthesized  
332 recombinant mAbs. C.F.G. and B.Z. made and purified antibody from the hybridoma and  
333 performed flow studies. C.F.G. and A.B. made and characterized the hCD63 expressing  
334 Cho cells. H.R. performed Edman sequencing. G.P., P.M.T., and C.F.G. wrote and edited  
335 the manuscript.

336

337

## 338 References

- 339 1. Köhler G, Milstein C. Continuous cultures of fused cells secreting antibody of  
340 predefined specificity. *Nature*. 1975;256(5517):495-7.
- 341 2. Liu JK. The history of monoclonal antibody development - Progress, remaining  
342 challenges and future innovations. *Annals of medicine and surgery* (2012).  
343 2014;3(4):113-6.
- 344 3. Zaroff S, Tan G. Hybridoma technology: the preferred method for monoclonal  
345 antibody generation for in vivo applications. *BioTechniques*. 2019;67(3):90-2.
- 346 4. Weller MG. Quality Issues of Research Antibodies. *Analytical chemistry insights*.  
347 2016;11:21-7.
- 348 5. Bradbury A, Plückthun A. Reproducibility: Standardize antibodies used in  
349 research. *Nature*. 2015;518(7537):27-9.
- 350 6. Eisinger K, Froehner SC, Adams ME, Krautbauer S, Buechler C. Evaluation of  
351 the specificity of four commercially available antibodies to alpha-syntrophin. *Analytical*  
352 *biochemistry*. 2015;484:99-101.
- 353 7. Köhler G, Hengartner H, Shulman MJ. Immunoglobulin production by lymphocyte  
354 hybridomas. *European journal of immunology*. 1978;8(2):82-8.
- 355 8. Shulman M, Wilde CD, Köhler G. A better cell line for making hybridomas  
356 secreting specific antibodies. *Nature*. 1978;276(5685):269-70.
- 357 9. Strohal R, Kroemer G, Wick G, Kofler R. Complete variable region sequence of a  
358 nonfunctionally rearranged kappa light chain transcribed in the nonsecretor P3-X63-  
359 Ag8.653 myeloma cell line. *Nucleic acids research*. 1987;15(6):2771.
- 360 10. Carroll WL, Mendel E, Levy S. Hybridoma fusion cell lines contain an aberrant  
361 kappa transcript. *Molecular immunology*. 1988;25(10):991-5.
- 362 11. Toleikis L, Broders O, Dübel S. Cloning single-chain antibody fragments (scFv)  
363 from hybridoma cells. *Methods in molecular medicine*. 2004;94:447-58.
- 364 12. Ding G, Chen X, Zhu J, Cao B. Identification of two aberrant transcripts derived  
365 from a hybridoma with amplification of functional immunoglobulin variable genes.  
366 *Cellular & molecular immunology*. 2010;7(5):349-54.
- 367 13. Kontsek P, Novák M, Kontseková E. Karyotype analysis of hybridomas producing  
368 monoclonal antibodies against different antigens. *Folia biologica*. 1988;34(2):99-104.
- 369 14. Bradbury ARM, Trinklein ND, Thie H, Wilkinson IC, Tandon AK, Anderson S, et  
370 al. When monoclonal antibodies are not monospecific: Hybridomas frequently express  
371 additional functional variable regions. *mAbs*. 2018;10(4):539-46.
- 372 15. Bradbury AR, Plückthun A. Getting to reproducible antibodies: the rationale for  
373 sequenced recombinant characterized reagents. *Protein engineering, design &*  
374 *selection : PEDS*. 2015;28(10):303-5.
- 375 16. Larrick JW, Danielsson L, Brenner CA, Wallace EF, Abrahamson M, Fry KE, et  
376 al. Polymemse Chain Reaction Using Mixed Primers: Cloning of Human Monoclonal  
377 Antibody Variable Region Genes from Single Hybridoma Cells. *Bio/Technology*.  
378 1989;7(9):934-8.
- 379 17. Greineder CF, Hood ED, Yao A, Khoshnejad M, Brenner JS, Johnston IH, et al.  
380 Molecular engineering of high affinity single-chain antibody fragment for endothelial  
381 targeting of proteins and nanocarriers in rodents and humans. *Journal of controlled*  
382 *release : official journal of the Controlled Release Society*. 2016;226:229-37.

- 383 18. Li J, Wang Y, Wang Z, Dong Z. Influences of amino acid sequences in FR1  
384 region on binding activity of the scFv and Fab of an antibody to human gastric cancer  
385 cells. *Immunology letters*. 2000;71(3):157-65.
- 386 19. de Haard HJ, Kazemier B, van der Bent A, Oudshoorn P, Boender P, van Gemen  
387 B, et al. Absolute conservation of residue 6 of immunoglobulin heavy chain variable  
388 regions of class IIA is required for correct folding. *Protein Engineering, Design and*  
389 *Selection*. 1998;11(12):1267-76.
- 390 20. Greineder CF, Chacko AM, Zaytsev S, Zern BJ, Carnemolla R, Hood ED, et al.  
391 Vascular immunotargeting to endothelial determinant ICAM-1 enables optimal  
392 partnering of recombinant scFv-thrombomodulin fusion with endogenous cofactor. *PLoS*  
393 *one*. 2013;8(11):e80110.
- 394 21. Greineder CF, Johnston IH, Villa CH, Gollomp K, Esmon CT, Cines DB, et al.  
395 ICAM-1-targeted thrombomodulin mitigates tissue factor-driven inflammatory  
396 thrombosis in a human endothelialized microfluidic model. *Blood advances*.  
397 2017;1(18):1452-65.
- 398 22. Greineder CF, Villa CH, Walsh LR, Kiseleva RY, Hood ED, Khoshnejad M, et al.  
399 Site-Specific Modification of Single-Chain Antibody Fragments for Bioconjugation and  
400 Vascular Immunotargeting. *Bioconjugate chemistry*. 2018;29(1):56-66.
- 401 23. Greineder CF, Brenza JB, Carnemolla R, Zaitsev S, Hood ED, Pan DC, et al.  
402 Dual targeting of therapeutics to endothelial cells: collaborative enhancement of delivery  
403 and effect. *FASEB journal : official publication of the Federation of American Societies*  
404 *for Experimental Biology*. 2015;29(8):3483-92.
- 405 24. Duan L, Pomerantz RJ. Elimination of endogenous aberrant kappa chain  
406 transcripts from sp2/0-derived hybridoma cells by specific ribozyme cleavage: utility in  
407 genetic therapy of HIV-1 infections. *Nucleic acids research*. 1994;22(24):5433-8.
- 408 25. Ostermeier C, Michel H. Improved Cloning of Antibody Variable Regions From  
409 Hybridomas by an Antisense-Directed RNase H Digestion of the P3-X63-Ag8.653  
410 Derived Pseudogene mRNA. *Nucleic acids research*. 1996;24(10):1979-80.
- 411 26. Hildreth JEK, Derr D, Azorsa DO. Characterization of a Novel Self-Associating  
412 Mr 40,000 Platelet Glycoprotein. *Blood*. 1991;77(1):121-32.
- 413 27. Chen I, Dorr BM, Liu DR. A general strategy for the evolution of bond-forming  
414 enzymes using yeast display. *Proceedings of the National Academy of Sciences of the*  
415 *United States of America*. 2011;108(28):11399-404.
- 416 28. Rous BA, Reaves BJ, Ihrke G, Briggs JA, Gray SR, Stephens DJ, et al. Role of  
417 adaptor complex AP-3 in targeting wild-type and mutated CD63 to lysosomes. *Mol Biol*  
418 *Cell*. 2002;13(3):1071-82.
- 419 29. Ruberti F, Cattaneo A, Bradbury A. The use of the RACE method to clone  
420 hybridoma cDNA when V region primers fail. *Journal of immunological methods*.  
421 1994;173(1):33-9.
- 422 30. Cochet O, Martin E, Fridman WH, Teillaud JL. Selective PCR amplification of  
423 functional immunoglobulin light chain from hybridoma containing the aberrant MOPC  
424 21-derived V kappa by PNA-mediated PCR clamping. *BioTechniques*. 1999;26(5):818-  
425 20, 22.
- 426 31. Nicholls PJ, Johnson VG, Blanford MD, Andrew SM. An improved method for  
427 generating single-chain antibodies from hybridomas. *Journal of immunological methods*.  
428 1993;165(1):81-91.

Pornnoppadol *et al.*

- 429 32. Khoshnejad M, Brenner JS, Motley W, Parhiz H, Greineder CF, Villa CH, et al.  
430 Molecular engineering of antibodies for site-specific covalent conjugation using  
431 CRISPR/Cas9. *Scientific reports*. 2018;8(1):1760.  
432
